# Supplementary material
Source: publisher figshare collection journal article supplement (https://tandf.figshare.com/ndownloader/files/32494463)
Supplement: Supplementary file 1 [file 32494463]

Supplementary material

**Supplementary Table 1: Outliers**

|  | **How outliers were handled** | **Number of outliers excluded** |
| --- | --- | --- |
| Maternal age | - | - |
| Maternal education | Unknown converted to missing | 55 unknown |
| Maternal BMI | BMI 0 and BMI >60 were excluded | 140 with BMI 0,  3 with BMI >60 |
| Marital status at registration | - | - |
| Ethnicity | - | - |
| Previous pregnancy history | - | - |
| Parity | - | - |
| Smoking during early pregnancy | 2 unknown converted to missing | - |
| Alcohol use during pregnancy | 1 unknown converted to missing | - |
| Folic acid use during pregnancy | - | - |
| Multi-vitamin use during pregnancy | - | - |
| IVF and insemination | - | - |
|  |  |  |
| Mode of delivery | - | - |
| Gestational age at birth | ≤100 and >307 days were excluded | 9 |
| Infant sex | - | - |
| Infant birth weight | 0 grams were excluded | 11 |
| APGAR ≤7 in 5 minute | - | - |

**Supplementary Table 2: Missing data (including the excluded outliers)**

|  | Missing data for N individuals |
| --- | --- |
| Maternal age | 0 |
| Maternal education | 490 |
| Maternal BMI | 281 |
| Marital status at registration | 340 |
| Ethnicity | 543 |
| Previous pregnancy history | 28 |
| Parity | 0 |
| Smoking during early pregnancy | 103 |
| Alcohol use during pregnancy | 217 |
| Folic acid use during pregnancy | 508 |
| Multi-vitamin use during pregnancy | 665 |
| IVF and insemination | 521 |
|  |  |
| Mode of delivery | 0 |
| Gestational age at birth | 9 |
| Infant sex | 0 |
| Infant birth weight | 14 |
| APGAR ≤7 in 5 minutes | 53 |
